# Supplementary material for: Mechanistic evaluation of the size dependent antimicrobial activity of water soluble QDs
Source: Royal Society of Chemistry journal article supplement (doi:10.1039/c5ay02742j), 2015-12-22
Supplement: c5ay02742j1.pdf [file c5ay02742j1.pdf]

Supplementary data

**Mechanistic evaluation of the size dependent antimicrobial activity of water soluble QDs**

Aakriti Tyagi<sup>1</sup>, Kamla Rawat<sup>2,3</sup>, Anita K. Verma<sup>1\*</sup> and H. B. Bohidar<sup>2,4\*</sup>

<sup>1</sup>Nanobiotech Lab, Dept of Zoology, Kirori Mal College, University of Delhi, India

<sup>2</sup>Special Centre for Nano Sciences, Jawaharlal Nehru University, New Delhi, India

<sup>3</sup>Inter University Accelerator Centre (IUAC), New Delhi, India

<sup>4</sup>School of Physical Sciences, Jawaharlal Nehru University, New Delhi, India

Corresponding Author Email: [bohi0700@mail.jnu.ac.in](mailto:bohi0700@mail.jnu.ac.in); [akamra23@hotmail.com](mailto:akamra23@hotmail.com)

Fax: +91 11 2674 1837; Tel: +91 11 2674 4637/4699

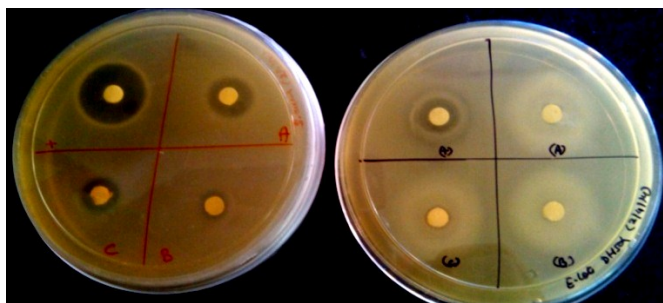

**Fig S1.** Antimicrobial activity of quantum dots against (a) Gram-positive and (b) Gram-negative bacteria, *S. aureus* and *E. coli*. Sample (A) =2.43 nm, sample (B) =3.75 nm, sample (C) =5.09 nm, (-) negative control; distilled water, (+) positive control; Gentamycin.
